# Supplementary material for: Interaction between an ADCY3 Genetic Variant and Two Weight-Lowering Diets Affecting Body Fatness and Body Composition Outcomes Depending on Macronutrient Distribution: A Randomized Trial
Source: MDPI journal article supplement (doi:10.3390/nu10060789), 2018-06-19
Supplement: s1 [file s1]

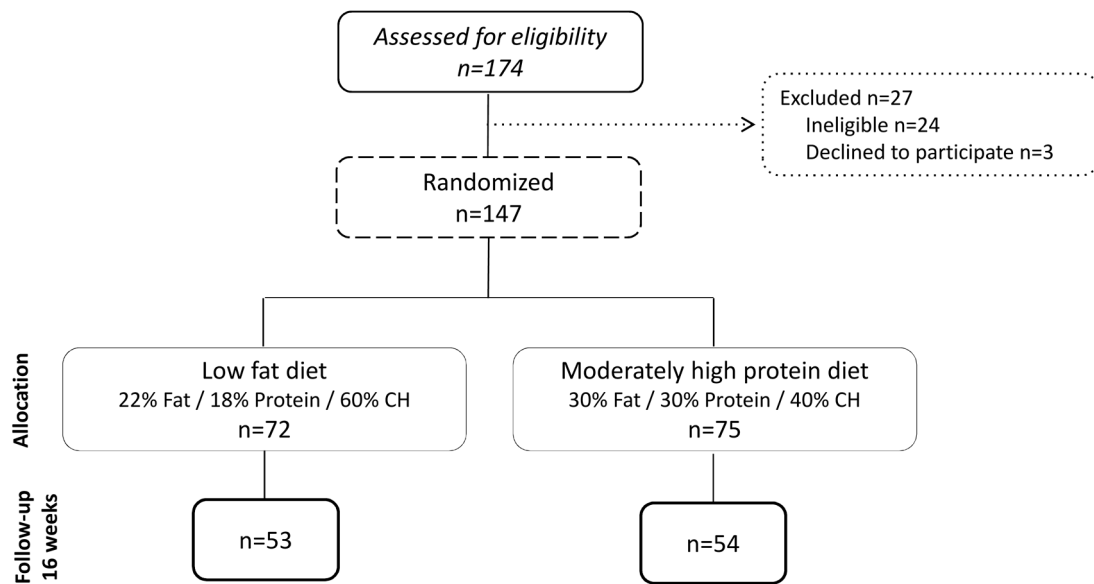

**Supplemental Figure 1. Flow-chart**
